# Supplementary material for: An integrated multiple driver mesocosm experiment reveals the effect of global change on planktonic food web structure
Source: PubMed Central journal article supplement (PMC8888609; doi:10.1038/s42003-022-03105-5), 2022-03-01
Supplement: 42003_2022_3105_MOESM3_ESM.pdf [file 42003_2022_3105_MOESM3_ESM.pdf]

## Description of Additional Supplementary Files

**File name:** Supplementary Data 1

**Description:** *Carbonate chemistry in the mesocosms during the experiment.* Dissolved inorganic carbon (DIC), partial pressure of CO<sub>2</sub> ( $p\text{CO}_2$ ), Bicarbonate (HCO<sub>3</sub><sup>-</sup>), Carbonate (CO<sub>3</sub><sup>2-</sup>), Carbon dioxide (CO<sub>2</sub>) and calcite saturation state ( $W_{\text{calcite}}$ ) were calculated based on pH and total alkalinity (TA) using CO2Sys (Pierrot et al. 2006); mean ± standard deviation.
